# Supplementary material
Source: publisher figshare collection journal article supplement (https://karger.figshare.com/ndownloader/files/33004697)
Supplement: Supplementary file 1 [file 33004697]

**Supp Table 3.** Karyotype of bambara groundnut metaphase chromosomes

| Chromosome Number1 | Long arm (l)2 ± SE μm | Short arm (s)2 ± SE μm | Relative chromosome length (Cl)3 ± SE μm | Arm ratio (l/s) ± SE μm | Centromeric type (CT) | Vsub50 C tandem repeats4 | Vsub400 ST tandem repeats4 | 45S rDNA | 5S rDNA4 |
| --- | --- | --- | --- | --- | --- | --- | --- | --- | --- |
| 1 | 1,29445 ± 0,13 | 1,12881 ± 0,11 | 2,42326 ± 0,24 | 1,1667 ± 0,04 | m | C | - | - | - |
| 2 | 1,12574 ± 0,09 | 0,90795 ± 0,09 | 2,03370 ± 0,17 | 1,2414 ± 0,07 | m | C | - | - | - |
| 3 | 1,06746 ± 0,08 | 0,91102 ± 0,08 | 1,97849 ±  0,16 | 1,1724 ± 0,04 | m | C | - | - | - |
| 4 | 1,07053 ± 0,09 | 0,87114 ± 0,09 | 1,94168 ± 0,18 | 1,2143 ± 0,06 | m | C | - | - | I |
| 5 | 1,05826 ± 0,18 | 0,75765 ± 0,08 | 1,81591 ± 0,26 | 1,4167 ± 0,08 | m | C  (strong) | ST | - | - |
| 6 | 1,21470 ± 0,11 | 0,50919 ± 0,06 | 1,72389 ± 0,15 | 2,3855 ± 0,3 | sm | C | - | ST | - |
| 7 | 0,9417 ± 0,09 | 0,77299 ± 0,09 | 1,71469 ± 0,18 | 1,2 ± 0,12 | m | C | - | - | - |
| 8 | 0,93556 ± 0,08 | 0,72391 ± 0,05 | 1,65947 ± 0,13 | 1,3043 ± 0,06 | m | C | - | - | - |
| 9 | 0,96317 ± 0,11 | 0,68096 ± 0,10 | 1,64414 ± 0,21 | 1,4091 ± 0,07 | m | C | - | - | - |
| 10 | 0,77299 ± 0,08 | 0,67176 ±  0,09 | 1,44475 ± 0,17 | 1,1905 ± 0,08 | m | C | - | ST | - |
| 11 | 0,85274 ± 0,09 | 0,61041 ± 0,06 | 1,46316 ± 0,15 | 1,4211 ± 0,10 | m | C | - | - | - |

1 The pairs of chromosomes were identified and measured using five different metaphase cells

2 The relative lengths of the short and long arms were calculated by averaging the five sets of chromosomes

3 Relative chromosome lengths were determined using averaging the total of lengths of the short and long arms

4 Centromere, subtelomere and interstitial regions are shown with the letters C, ST and I
